# Supplementary material for: Identification of Reference Genes in Human Myelomonocytic Cells for Gene Expression Studies in Altered Gravity
Source: Biomed Res Int. 2015 Jan 13;2015:363575. doi: 10.1155/2015/363575 (PMC4309215; doi:10.1155/2015/363575)
Supplement: Supplementary file 1 — Supplementary Table 1 summarizes the differential gene expression analysis of the potential reference genes presented in our study. Fluorescence, mean fluorescence and standard deviation values are given for the individual gene probes at different g-conditions measured during the 19th DLR Parabolic flight campaign as well as for the TEXUS-49 sounding rocket mission. Gene expression levels were compared between the different g-conditions for those genes that are represented by at least 3 probes and p-values were calculated. Significant p-values below 0,05 are displayed in red. Supplementary Table 2 shows the analysis of the ABC transporter genes. Fluorescence, mean fluorescence and standard deviation values are given for the individual gene probes at different g-conditions measured during the 19th DLR Parabolic flight campaign as well as for the TEXUS-49 sounding rocket mission. Gene expression levels were compared between the different gconditions for those genes that are represented by at least 3 probes and p-values were calculated. Significant p-values below 0,05 are displayed in red. Supplementary Table 3 displays the analyzed tRNA related genes. Fluorescence, mean fluorescence and standard deviation values are given for the individual gene probes at different g-conditions measured during the 19th DLR Parabolic flight campaign as well as for the TEXUS-49 sounding rocket mission. Gene expression levels were compared between the different g-conditions for those genes that are represented by at least 3 probes and p-values were calculated. Significant p-values below 0,05 are displayed in red. [file 363575.f1.zip]

Archive with 3 entries (3 files):
- Supplementary Table 1.xlsx
- Supplementary Table 2.xlsx
- Supplementary Table 3.xlsx
