# Supplementary material for: Identification of Reference Genes in Human Myelomonocytic Cells for Gene Expression Studies in Altered Gravity
Source: Biomed Res Int. 2015 Jan 13;2015:363575. doi: 10.1155/2015/363575 (PMC4309215; doi:10.1155/2015/363575)
Supplement: Supplementary file 1 — Supplementary Table 1 summarizes the differential gene expression analysis of the potential reference genes presented in our study. Fluorescence, mean fluorescence and standard deviation values are given for the individual gene probes at different g-conditions measured during the 19th DLR Parabolic flight campaign as well as for the TEXUS-49 sounding rocket mission. Gene expression levels were compared between the different g-conditions for those genes that are represented by at least 3 probes and p-values were calculated. Significant p-values below 0,05 are displayed in red. Supplementary Table 2 shows the analysis of the ABC transporter genes. Fluorescence, mean fluorescence and standard deviation values are given for the individual gene probes at different g-conditions measured during the 19th DLR Parabolic flight campaign as well as for the TEXUS-49 sounding rocket mission. Gene expression levels were compared between the different gconditions for those genes that are represented by at least 3 probes and p-values were calculated. Significant p-values below 0,05 are displayed in red. Supplementary Table 3 displays the analyzed tRNA related genes. Fluorescence, mean fluorescence and standard deviation values are given for the individual gene probes at different g-conditions measured during the 19th DLR Parabolic flight campaign as well as for the TEXUS-49 sounding rocket mission. Gene expression levels were compared between the different g-conditions for those genes that are represented by at least 3 probes and p-values were calculated. Significant p-values below 0,05 are displayed in red. [file 363575.f1.zip › Supplementary Table 1.xlsx]

## Sheet: potential reference genes
				19th DLR PFC																	TEXUS-49
				H/W			1g			1.8g			µg			p-values					H/W			BL			µg			p-values
Gene symbol	Name	Accession Number		FI	Mean FI	SD	FI	Mean FI	SD	FI	Mean FI	SD	FI	Mean FI	SD	H/W vs. 1g	1g vs. 1.8g	1.8g vs. µg	1g vs. µg		FI	Mean FI	SD	FI	Mean FI	SD	FI	Mean FI	SD	H/W vs. BL	BL vs. µg	H/W vs. µg
ACTB	Homo sapiens actin, beta	NM_001101		36753.7	37119	516.667	33591.3	33485.7	149.352	34214	34170.2	61.9669	33740.6	33610.2	184.5						42350.8	42166.6	260.404	42014.5	42475.3	651.589	40780.7	41248.2	661.065
		BC002409		37484.3			33380.1			34126.4			33479.7								41982.5			42936			41715.6
ALB	Homo sapiens albumin	NM_000477		40.2088	42.1321	2.04463	40.0062	40.2759	1.21502	39.8266	40.6175	0.881403	40.2769	40.0961	0.714288	0.2627	0.71541	0.472384	0.838341		18.5915	18.0186	1.28765	16.4761	17.4749	1.17869	19.8106	17.8795	1.88043	0.61842	0.770824	0.921498
		BC035969		44.2796			41.6031			41.5677			40.7026								16.5439			17.1737			16.0542
		BC034023		41.9079			39.2184			40.4582			39.3088								18.9204			18.775			17.7736
		BC041789		56.7383			51.4564			56.8729			54.1928								40.9937			31.0254			34.1163
B2M	Homo sapiens beta-2-microglobulin	NM_004048		13866.3	13866.3		14219.7	14219.7		15868.7	15868.7		13887.5	13887.5							7097.52	7097.52		8960.11	8960.11		7742.59	7742.59
B4GALT6	Homo sapiens UDP-Gal:betaGlcNAc beta 1,4- galactosyltransferase	NM_004775		46.5713	40.553	7.65336	39.2462	39.3007	7.61886	42.9653	43.413	11.3782	39.745	39.9215	7.61719	0.850606	0.634152	0.684676	0.925297		14.4988	17.1478	4.25728	13.963	17.6695	6.05108	14.2165	15.9494	3.26041	0.909319	0.693334	0.719664
		AF069054		43.1482			46.9466			55.0084			47.6254								22.0586			24.6523			19.7103
		BC074835		31.9395			31.7092			32.2653			32.3941								14.8861			14.3932			13.9214
G6PD	Homo sapiens glucose-6-phosphate dehydrogenase	NM_000402		14425.2	14425.2		12372.1	12372.1		10894.4	10894.4		12070.5	12070.5							14539.6	14539.6		13680.2	13680.2		13938.6	13938.6
GAPDH	Homo sapiens glyceraldehyde-3-phosphate dehydrogenase	NM_002046		20741	21791.2	914.225	19509.6	21162.3	1447.99	17644.1	19124.6	1319.5	18574	20823.2	2005	0.565234	0.146573	0.297145	0.825037		25353.5	23385.8	1721.78	27474.4	24862.1	2271.02	27405.9	25451.2	1692.9	0.423766	0.738301	0.212616
		BC001601		22223.5			22208.1			19553			21472.5								22648.1			23754.3			24462.8
		BC009081		22409.1			21769.2			20176.7			22423.1								22155.8			23357.5			24484.8
GUSB	Homo sapiens glucuronidase, beta	NM_000181		14843.1	14843.1		14104.8	14104.8		12683.8	12683.8		13287.7	13287.7							9051.87	9051.87		9764.97	9764.97		9214.56	9214.56
HMBS	Homo sapiens hydroxymethylbilane synthase	NM_000190		3308.13	2184.2	973.765	2394.98	1612.83	677.489	1510.59	998.726	443.394	1840.01	1226.98	531.591	0.456316	0.269544	0.599407	0.483333		4172.51	2921.4	1084.02	4350.91	3087.49	1094.22	3606.79	2568.23	899.655	0.860926	0.56121	0.687245
		NM_001024382		1593.74			1234.49			752.355			893.442								2329.49			2468.47			2069.69
		BC008149		1650.74			1209			733.229			947.479								2262.18			2443.1			2028.22
HPRT1	Homo sapiens hypoxanthine phosphoribosyltransferase 1	NM_000194		3958.67	3958.67		4022.84	4022.84		4376.31	4376.31		4044.09	4044.09							2434.99	2434.99		4567.53	4567.53		2375.15	2375.15
HSP90AA1	Homo sapiens heat shock protein 90kDa alpha (cytosolic), class A member 1	NM_001017963		13047.6	7598.52	7687.33	13966.7	8081.69	7797.66	15059.6	8596.38	8439.31	13633.8	8103.61	7859.69	0.939094	0.910024	0.9036	0.992904		7628.59	5043.1	5858.45	9525.64	6291.59	7252.97	7511.06	5122.3	6176.38	0.773297	0.791245	0.983963
		NM_005348		15692.6			15985.8			17226			16221.3								12069.7			14997.1			12628.5
		AJ890083		1253.81			1583.94			1646.4			1499.85								459.143			626.808			333.19
		BX247955		400.009			790.395			453.494			1059.52								14.9801			16.7871			16.4283
HSP90AB1	Homo sapiens heat shock protein 90kDa alpha (cytosolic), class B member 1	NM_007355		27438.2	27438.2		26965	26965		26454	26454		26927.6	26927.6							23307.4	23307.4		24493.3	24493.3		23087.1	23087.1
PLA2G4A	Homo sapiens phospholipase A2, group IVA	NM_024420		3017.42	3176.94	225.591	2978.15	3051.21	103.318	1860.4	1883.11	32.1178	2379.92	2387.54	10.7658						1574.96	1559.5	21.8599	2695.8	2751.19	78.3338	1369.09	1314.76	76.8333
		BC114340		3336.45			3124.26			1905.83			2395.15								1544.05			2806.58			1260.43
POLR2A	Homo sapiens polymerase (RNA) II (DNA directed) polypeptide A, 220kDa	NM_000937		6665.51	6222.85	626.021	7194.11	5959.23	1746.38	7527.21	5077.47	3464.46	6988.17	5230.03	2486.4						6441.14	6863.04	596.653	7492.34	7078.23	585.633	6714.67	5633.2	1529.43
		BC067295		5780.19			4724.35			2627.73			3471.88								7284.93			6664.13			4551.73
PPIA	Homo sapiens peptidylprolyl isomerase A (cyclophilin A)	NM_021130		3804	9306.39	4915.49	4528.76	9195.93	4188.87	3416.73	9972.35	5789.88	3903.36	9674.88	5107.68	0.977819	0.860744	0.950044	0.906342		2375.31	7707.63	5346.17	3053.61	7592.31	4759.59	1836.19	7323.76	5385.28	0.979091	0.951547	0.93439
		BC073992		10851.4			10429.6			12114.1			11509.2								7680.05			7177.67			7534.52
		BC000689		13263.7			12629.4			14386.2			13612.1								13067.5			12545.7			12600.6
RPL13A	Homo sapiens ribosomal protein L13a	NM_012423		10683.5	19798	12889.8	11491.7	20751.3	13095.1	10853	20869.8	14166	11337.4	21036.2	13716.3						10810.2	17895.2	10019.8	13689.7	21407.6	10914.8	13095.6	19899.2	9621.66
		BC001675		28912.4			30010.9			30886.7			30735.1								24980.2			29125.6			26702.7
RPLP0	Homo sapiens ribosomal protein, large, P0	NM_001002		9713.66	11352.3	1728.26	11176.6	11633.8	426.193	9854.04	11380.9	2060.5	11817.2	12714.9	837.098	0.739696	0.800426	0.234587	0.0424874		7246.66	8027.1	1233.45	7519.91	9036.11	1538.2	5471.04	7406.41	2622.46	0.287076	0.272787	0.649857
		BC001127		13482.5			12200.9			13852.9			13804								9540.84			10494.2			10250.5
		BC008594		12946.7			11902.7			13400.5			13360.6								9196.7			10881.6			10307.5
		BC000087		10369.8			11605.3			10081.3			12444.3								7133.53			8007.3			5470.28
		BC070194		10249			11283.3			9715.68			12148.6								7017.78			8277.62			5532.82
		AF274958		20396			20245.3			22687.3			21551.5								24600.5			25634.5			25924
SDHA	Homo sapiens succinate dehydrogenase complex, subunit A, flavoprotein (FP)	NM_004168		10369.8	10369.8		11320.9	11320.9		9967.39	9967.39		10645.1	10645.1							9363.94	9363.94		8464.45	8464.45		7355.46	7355.46
TBP	Homo sapiens TATA box binding protein	NM_003194		3859.77	4158.56	310.248	3168.1	3271.43	217.261	2297.74	2287.2	161.089	2771.02	2776.82	170.762	0.0191727	0.00423561	0.0226376	0.038964		3750.59	3738.25	143.898	4605.68	4466.01	257.59	3514.25	3517.69	53.8687	0.0215047	0.0200736	0.103705
		X54993		4136.8			3125.13			2121.1			2609.03								3875.59			4623.6			3465.63
		BC109053		4479.12			3521.07			2442.77			2950.41								3588.59			4168.75			3573.2
TUBA1	Homo sapiens tubulin, alpha 4a	NM_006000		6838.67	8973.68	3019.35	6242.9	8092.72	2616.05	5382.65	7388.25	2836.35	5828.87	7685.84	2626.16						12458.1	15081.1	3709.5	9276.73	11287.3	2843.33	9576.61	11711.9	3019.71
		BC009238		11108.7			9942.55			9393.84			9542.82								17704.2			13297.8			13847.1
UBC	Homo sapiens ubiquitin C	NM_021009		29330.2	27672.1	2344.93	27461.1	26300.6	1641.2	27419.2	27258.6	227.122	27773.1	27530.7	342.729						42265.7	39448.6	3983.94	43813.9	40262.1	5022.93	40865.6	38372.9	3525.23
		BC014880		26014			25140.1			27098			27288.4								36631.6			36710.4			35880.2
YWHAZ	Homo sapiens tyrosine 3-monooxygenase/tryptophan 5-monooxygenase activation protein, zeta	NM_003406		7438	9136.31	2070.39	7581.14	9445.22	1990.27	8353.12	9843.3	2125.25	7815.92	9853.06	2184.44	0.780816	0.723874	0.993384	0.72142		2819.45	3970.64	1498.1	3891.2	5738.74	2118.2	2363.16	3776.01	1596.71	0.0993109	0.0757528	0.818041
		BC068456		5572.47			6574.2			6607.55			6608.93								1951.41			2895.51			2005.3
		BC108281		10784			11831.1			12829.7			12753.5								5309.28			7268.29			5243.08
		BC101483		10369.8			9932.22			8913.03			9617.19								4841.04			6732.38			3702.28
		BC083508		8566.56			8651.89			9738.61			9501.24								3487.55			4849.43			3403.73
		BC072426		9830.85			9781.91			10611.9			10645.1								3237.36			5446.07			3194.34
		BC003623		11392.5			11764.1			11849.2			12029.6								6148.42			9088.33			6520.2
