# Supplementary material for: Identification of Reference Genes in Human Myelomonocytic Cells for Gene Expression Studies in Altered Gravity
Source: Biomed Res Int. 2015 Jan 13;2015:363575. doi: 10.1155/2015/363575 (PMC4309215; doi:10.1155/2015/363575)
Supplement: Supplementary file 1 — Supplementary Table 1 summarizes the differential gene expression analysis of the potential reference genes presented in our study. Fluorescence, mean fluorescence and standard deviation values are given for the individual gene probes at different g-conditions measured during the 19th DLR Parabolic flight campaign as well as for the TEXUS-49 sounding rocket mission. Gene expression levels were compared between the different g-conditions for those genes that are represented by at least 3 probes and p-values were calculated. Significant p-values below 0,05 are displayed in red. Supplementary Table 2 shows the analysis of the ABC transporter genes. Fluorescence, mean fluorescence and standard deviation values are given for the individual gene probes at different g-conditions measured during the 19th DLR Parabolic flight campaign as well as for the TEXUS-49 sounding rocket mission. Gene expression levels were compared between the different gconditions for those genes that are represented by at least 3 probes and p-values were calculated. Significant p-values below 0,05 are displayed in red. Supplementary Table 3 displays the analyzed tRNA related genes. Fluorescence, mean fluorescence and standard deviation values are given for the individual gene probes at different g-conditions measured during the 19th DLR Parabolic flight campaign as well as for the TEXUS-49 sounding rocket mission. Gene expression levels were compared between the different g-conditions for those genes that are represented by at least 3 probes and p-values were calculated. Significant p-values below 0,05 are displayed in red. [file 363575.f1.zip › Supplementary Table 2.xlsx]

## Sheet: ABC transporter genes
					19th DLR PFC																	TEXUS-49
					H/W			1g			1.8g			µg			p-values					H/W			BL			µg			p-values
N°	Gene symbol	Name	Accession Number		FI	Mean FI	SD	FI	Mean FI	SD	FI	Mean FI	SD	FI	Mean FI	SD	H/W vs. 1g	1g vs. 1.8g	1.8g vs. µg	1g vs. µg		FI	Mean FI	SD	FI	Mean FI	SD	FI	Mean FI	SD	H/W vs. BL	BL vs. µg	H/W vs. µg
1	ABCA1	Homo sapiens ATP-binding cassette, sub-family A, member 1	AK024328		178.775	94.6218	74.2516	240.726	112.485	111.794	303.83	133.569	147.779	286.002	128.293	137.172	0.830589	0.854046	0.966036	0.884814		245.936	98.5339	128.158	155.636	67.1705	77.25	247.868	99.5701	128.975	0.738712	0.731838	0.992597
			AF165281		38.3329			35.5828			38.5808			36.7023								13.4848			13.0388			13.5823
			NM_005502		66.7576			61.1445			58.2966			62.1757								36.1807			32.837			37.2596
2	ABCA10	Homo sapiens ATP-binding cassette, sub-family A, member 10	AL832004		64.1724	77.0256	18.1772	52.0249	67.8089	22.322	55.6886	78.1427	31.7549	55.406	73.3785	25.417						52.5872	43.3279	13.0946	58.1336	47.2086	15.4502	44.4607	38.2666	8.75988
			NM_080282		89.8789			83.593			100.597			91.3511								34.0686			36.2837			32.0724
3	ABCA11	Homo sapiens ATP-binding cassette, sub-family A, member 11	BC098116		208.931	203.693	5.11188	153.882	159.379	5.21504	164.068	171.435	9.00886	159.847	160.067	1.5703	0.000464256	0.13262	0.156826	0.844275		121.484	126.851	6.81482	145.264	160.328	21.3923	101.659	109.255	13.9318	0.102229	0.0327054	0.147111
			BC105084		203.433			164.257			168.759			161.735								134.518			184.814			125.334
			BC099730		198.717			159.997			181.479			158.618								124.552			150.906			100.771
4	ABCA12	Homo sapiens ATP-binding cassette, sub-family A, member 12	AF418105		132.401	95.8117	51.7451	183.448	119.169	90.905	209.065	138.45	99.8645	233.414	146.847	122.425						613.73	331.257	399.477	279.827	156.364	174.602	305.735	173.555	186.932
			NM_015657		59.2224			54.8892			67.8356			60.2793								48.7841			32.9017			41.3742
5	ABCA13	Homo sapiens ATP-binding cassette, sub-family A, member 13	NM_152701		72.2137	149.793	138.848	43.3981	150.234	178.961	45.4349	148.679	161.479	41.557	152.023	182.318	0.996636	0.988841	0.976268	0.987895		17.1173	118.906	137.727	31.7572	118.441	129.873	19.2963	136.801	182.247	0.995754	0.859486	0.865619
			AK128570		228.904			138.524			144.886			128.982								172.221			204.008			148.107
			AK131360		48.6659			65.0091			84.9469			72.8239								38.0697			25.4113			44.8846
			AK091195		42.0277			41.725			40.4327			44.6798								29.0024			24.898			22.7293
			AF501281		357.153			462.516			427.692			472.071								338.12			306.132			448.987
6	ABCA2	Homo sapiens ATP-binding cassette, sub-family A, member 2	NM_001606		633.939	758.222	175.762	589.832	728.02	195.428	575.184	706.465	185.66	487.183	642.648	219.861						748.319	1024.57	390.673	553.523	741.601	265.983	1095.67	1418.76	456.913
			AF178941		882.505			866.208			837.747			798.113								1300.81			929.68			1741.84
7	ABCA3	Homo sapiens ATP-binding cassette, sub-family A, member 3	BC062779		1149.75	1149.95	0.281811	1172.12	924.882	349.643	552.056	459.657	130.672	785.153	670.58	162.03						1403	1217.92	261.744	1501.72	1203.6	421.605	811.586	810.359	1.73568
			NM_001089		1150.14			677.647			367.258			556.007								1032.84			905.481			809.131
8	ABCA4	Homo sapiens ATP-binding cassette, sub-family A, member 4	NM_000350		60.1716	52.1481	11.3469	64.8224	54.6898	14.3296	87.0287	71.6848	21.6996	71.6592	60.2518	16.1325						53.6434	41.5497	17.1031	36.7479	27.2602	13.4176	46.6831	33.6474	18.4353
			AB210040		44.1246			44.5573			56.3409			48.8444								29.456			17.7726			20.6117
9	ABCA5	Homo sapiens ATP-binding cassette, sub-family A, member 5	AJ512612		46.4092	34.2929	9.45074	47.9776	34.7739	10.4727	51.1513	35.3684	11.8026	48.7304	34.9056	11.2963	0.176763	0.824338	0.896551	0.928425		28.9139	15.5693	15.0949	28.6748	16.1603	16.2103	28.3145	15.0602	14.2215	0.924614	0.848686	0.922261
			NM_018672		34.8689			36.5049			37.041			37.005								17.337			18.3212			16.5799
			AJ275973		34.1203			34.3851			35.2764			34.194								13.4198			13.5131			13.8187
			AY028897		33.8896			33.4318			33.7878			33.5179								15.9511			16.6467			14.782
			AK056533		54.8804			57.5367			60.6762			59.5822								49.9291			53.2323			47.385
10	ABCA6	Homo sapiens ATP-binding cassette, sub-family A, member 6	NM_080284		81.5719	81.5719		72.4925	72.4925		63.3938	63.3938		78.8271	78.8271							56.5992	56.5992		52.0873	52.0873		55.5849	55.5849
11	ABCA7	Homo sapiens ATP-binding cassette, sub-family A, member 7	NM_019112		2851.69	2851.69		1488.25	1488.25		1211.35	1211.35		1267.53	1267.53							1255.29	1255.29		1055.78	1055.78		1508.92	1508.92
12	ABCA8	Homo sapiens ATP-binding cassette, sub-family A, member 8	NM_007168		83.8181	62.5476	30.081	125.131	84.7853	57.058	92.9395	68.8038	34.1331	136.584	90.5794	65.0597						94.8187	61.2473	47.4771	73.3574	47.8793	36.0314	78.0156	50.5983	38.7739
			BC047765		41.2771			44.4392			44.668			44.5752								27.6759			22.4013			23.181
13	ABCA9	Homo sapiens ATP-binding cassette, sub-family A, member 9	NM_080283		53.345	48.9979	9.09901	58.9243	51.4755	11.2621	58.6452	51.5823	10.6791	60.8042	52.6957	12.2493	0.782298	0.991059	0.91136	0.905098		30.4986	24.1217	7.29937	33.4703	24.5644	9.08345	35.0952	27.5005	10.4847	0.950824	0.732853	0.673365
			BC062472		38.5407			38.5196			39.2971			38.6048								16.1602			15.3133			15.538
			NM_172386		55.108			56.9826			56.8048			58.6781								25.7063			24.9098			31.8683
14	ABCB1	Homo sapiens ATP-binding cassette, sub-family B (MDR/TAP), member 1	NM_000927		50.4083	53.0954	3.8001	61.3874	60	1.96203	81.909	81.5534	0.502841	63.0476	65.9606	4.11962						65.1873	59.9788	7.36601	41.8826	37.704	5.90949	39.1123	41.8758	3.90813
			AF016535		55.7825			58.6126			81.1979			68.8736								54.7702			33.5253			44.6392
15	ABCB10	Homo sapiens ATP-binding cassette, sub-family B (MDR/TAP), member 10	NM_012089		846.473	1186.9	481.442	543.26	965.394	596.987	440.168	894.315	642.262	466.767	894.747	605.255						138.325	361.853	316.116	570.032	938.723	521.407	201.32	436.745	332.94
			BC064930		1527.33			1387.53			1348.46			1322.73								585.38			1307.41			672.169
16	ABCB11	Homo sapiens ATP-binding cassette, sub-family B (MDR/TAP), member 11	NM_003742		57.9927	57.9927		58.2506	58.2506		79.6598	79.6598		78.5059	78.5059							27.8841	27.8841		22.9128	22.9128		25.8883	25.8883
17	ABCB4	Homo sapiens ATP-binding cassette, sub-family B (MDR/TAP), member 4	BC020618		37.0263	36.6427	0.542541	38.2	39.1972	1.41022	41.2774	42.5699	1.82781	39.332	40.6558	1.87224						21.0963	20.4338	0.936993	15.8774	16.3615	0.684726	16.6439	18.1861	2.18106
			NM_000443		36.2591			40.1943			43.8623			41.9797								19.7712			16.8457			19.7284
18	ABCB5	Homo sapiens ATP-binding cassette, sub-family B (MDR/TAP), member 5	AY851364		125.905	81.4597	40.2664	197.4	114.116	74.9811	362.024	186.13	156.265	267.334	143.097	110.675	0.552912	0.525805	0.718988	0.728827		47.3824	46.5882	18.1751	27.0593	28.7743	12.7836	68.4733	57.332	29.4886	0.244897	0.230277	0.62499
			BC104920		47.411			51.9816			63.3292			55.0389								28.029			16.9349			23.8959
			NM_178559		71.0632			92.9646			133.038			106.917								64.3532			42.3289			79.6267
19	ABCB6	Homo sapiens ATP-binding cassette, sub-family B (MDR/TAP), member 6	NM_005689		569.12	569.12		507.073	507.073		447.939	447.939		533.025	533.025							341.933	341.933		266.714	266.714		331.395	331.395
20	ABCB7	Homo sapiens ATP-binding cassette, sub-family B (MDR/TAP), member 7	NM_004299		2567.06	2567.06		2412.81	2412.81		1828.7	1828.7		2165.67	2165.67							1045.44	1045.44		2324.17	2324.17		1044.72	1044.72
21	ABCB8	Homo sapiens ATP-binding cassette, sub-family B (MDR/TAP), member 8	AK002018		2134.67	1657.48	1106.18	1140.86	843.154	506.864	805.985	648.973	351.764	826.35	640.162	344.528						3567.51	2342.78	1849.02	2454.99	1593.51	1269.92	2468.64	1650.74	1155.28
			NM_007188		2444.97			1130.7			894.886			851.534								3244.99			2190.43			2154.44
			AK126885		392.794			257.908			246.047			242.601								215.854			135.104			329.122
22	ABCB9	Homo sapiens ATP-binding cassette, sub-family B (MDR/TAP), member 9	AB112583		309.179	247.751	152.432	250.185	295.976	205.398	160.542	287.603	229.383	183.165	344.896	275.292	0.685332	0.953026	0.730245	0.758922		294.163	445.818	210.627	295.827	348.036	110.545	214.867	492.394	302.627	0.393187	0.36197	0.785604
			NM_203444		345.44			471.852			506.954			564.52								577.841			398.636			655.258
			NM_019624		411.124			541.602			560.694			705.005								753.415			497.916			942.939
			AB112582		108.123			157.17			154.293			212.421								323.598			345.1			365.612
			BC017348		64.8867			59.0707			55.534			59.372								280.073			202.701			283.293
23	ABCC1	Homo sapiens ATP-binding cassette, sub-family C (CFTR/MRP), member 1	AB209120		3997.27	3140.46	751.712	4100.55	3309.29	743.991	2544.03	2258.45	325.885	3439.78	2934.79	496.933	0.795873	0.119272	0.131166	0.514068		3148.83	2405.02	686.831	3775.89	3096.07	634.603	2370.21	2020.76	398.489	0.270146	0.0796745	0.459776
			NM_019900		2832.38			3203.43			2327.88			2918.27								2271.45			2993.05			2105.29
			NM_004996		2591.73			2623.91			1903.45			2446.32								1794.79			2519.29			1586.79
24	ABCC10	Homo sapiens ATP-binding cassette, sub-family C (CFTR/MRP), member 10	NM_033450		1950.19	1950.19		2128.32	2128.32		1931.49	1931.49		2124.64	2124.64							1807.9	1807.9		1440.05	1440.05		1483.72	1483.72
25	ABCC11	Homo sapiens ATP-binding cassette, sub-family C (CFTR/MRP), member 11	NM_032583		82.3388	141.627	83.8469	128.541	235.957	151.908	182.937	264.461	115.293	138.607	249.301	156.544						73.5687	157.807	119.131	47.9806	129.656	115.506	76.4132	184.643	153.06
			BC039085		200.916			343.372			345.986			359.994								242.045			211.331			292.873
26	ABCC12	Homo sapiens ATP-binding cassette, sub-family C (CFTR/MRP), member 12	AK127951		169.653	153.137	12.7102	239.375	212.76	27.9594	306.361	257.757	44.3453	254.969	239.421	26.5998	0.0163088	0.146003	0.510454	0.216428		168.039	156.308	8.74376	118.178	108.255	10.1872	164.769	154.288	11.9105	0.000414968	0.00117249	0.794433
			NM_145187		153.595			206.442			279.451			248.522								156.678			106.729			150.348
			NM_033226		138.835			176.24			205.351			199.762								147.224			113.418			162.824
			BC036378		150.467			228.984			239.864			254.429								153.292			94.6946			139.21
27	ABCC13	Homo sapiens ATP-binding cassette, sub-family C (CFTR/MRP), member 13	NM_138726		61.1767	74.2633	29.0443	75.637	102.405	54.6741	119.221	142.661	77.4203	88.1434	114.453	58.3737	0.408696	0.431676	0.583402	0.773399		18.0229	27.3184	7.83957	15.9307	23.1417	6.53641	18.3334	26.9762	7.0998	0.445374	0.457271	0.950523
			NM_172026		83.4436			112.181			168.678			138.427								23.8907			19.5077			25.0434
			NM_172024		109.888			174.19			232.894			182.527								32.0551			30.0071			35.168
			NM_172025		42.5448			47.6096			49.8527			48.7159								35.305			27.1212			29.36
28	ABCC3	Homo sapiens ATP-binding cassette, sub-family C (CFTR/MRP), member 3	NM_003786		62.515	62.515		75.6511	75.6511		105.113	105.113		86.8823	86.8823							46.2775	46.2775		28.4633	28.4633		39.1866	39.1866
29	ABCC4	Homo sapiens ATP-binding cassette, sub-family C (CFTR/MRP), member 4	AF541977		2916.86	1497.37	199.754	2754.17	1437.84	279.449	1279.62	857.047	30.6503	1926.81	1067.01	91.2629	0.780497	0.0675792	0.0459488	0.137989		1339.33	765.344	293.669	2298.38	1382.37	294.641	889.432	537.871	140.922	0.062043	0.0227937	0.316448
			BC041560		1556.08			1698.68			865.302			1119.47								790.439			1473.47			553.427
			AY133678		1661.19			1471.94			882.725			1119.94								1045.66			1620.7			670.368
			NM_005845		1274.84			1142.91			823.115			961.631								459.933			1052.93			389.816
30	ABCC5	Homo sapiens ATP-binding cassette, sub-family C (CFTR/MRP), member 5	NM_005688		74.8671	715.161	970.666	47.9836	620.694	915.612	39.1516	372.059	536.576	40.5795	491.866	729.355	0.90834	0.710305	0.830915	0.85855		18.0208	272.75	418.101	28.2712	291.666	416.009	20.3103	203.763	291.372	0.958366	0.780932	0.827436
			AY196484		1832			1676.69			991.054			1333.31								755.281			771.258			539.736
			NM_001023587		238.621			137.408			85.9711			101.707								44.9485			75.4678			51.2432
31	ABCC6	Homo sapiens ATP-binding cassette, sub-family C (CFTR/MRP), member 6	BC050733		72.8562	75.2698	3.65281	92.6064	89.4718	10.4955	131.945	115.982	20.2346	100.836	97.3278	12.7907	0.132397	0.137291	0.260431	0.458694		35.6485	58.7926	41.2826	25.6234	57.5619	55.1287	33.0851	74.4259	62.4394	0.976903	0.743776	0.738483
			AY078405		79.4723			98.0428			122.777			107.999								34.2742			25.8433			43.9408
			NM_001171		73.481			77.7661			93.2247			83.1492								106.455			121.219			146.252
32	ABCC8	Homo sapiens ATP-binding cassette, sub-family C (CFTR/MRP), member 8	NM_000352		139.167	139.167		185.136	185.136		303.342	303.342		200.342	200.342							165.778	165.778		70.9829	70.9829		208.583	208.583
33	ABCC9	Homo sapiens ATP-binding cassette, sub-family C (CFTR/MRP), member 9	NM_020297		47.5736	49.0484	2.83233	54.0016	53.3415	5.14836	55.7376	54.5194	2.82291	62.5531	57.4128	6.04174	0.292229	0.750472	0.509847	0.425705		85.8693	64.5983	27.1902	61.8465	50.8248	20.8539	70.3335	55.8465	25.5162	0.52705	0.805355	0.705246
			BC033804		52.3138			47.8949			56.5286			50.7579								33.9637			26.7727			26.3843
			NM_005691		47.2578			58.1279			51.2919			58.9275								73.9619			63.8551			70.8217
34	ABCD1	Homo sapiens ATP-binding cassette, sub-family D (ALD), member 1	BC015541		8831.85	8771.36	85.5507	7139.96	6873.98	376.145	4816.27	4869.6	75.4177	6090.31	6007.66	116.89						18260	17798.7	652.384	13891.4	13765.9	177.443	13617.7	13706.1	124.949
			NM_000033		8710.86			6608.01			4922.92			5925								17337.4			13640.4			13794.4
35	ABCD2	Homo sapiens ATP-binding cassette, sub-family D (ALD), member 2	BC104901		42.5713	40.4026	3.06703	44.9061	41.6393	4.61998	45.0945	41.757	4.71989	43.6878	40.8807	3.96985						16.1781	15.3524	1.16768	17.2741	16.3914	1.24838	17.1901	15.7595	2.02325
			NM_005164		38.2339			38.3725			38.4196			38.0736								14.5267			15.5086			14.3288
36	ABCD3	Homo sapiens ATP-binding cassette, sub-family D (ALD), member 3	BC009712		793.54	952.87	225.326	642.472	603.035	55.7732	427.118	346.569	113.913	484.1	434.015	70.8305						481.77	413.947	95.9152	653.317	814.741	228.287	295.425	280.203	21.5281
			NM_002858		1112.2			563.597			266.02			383.93								346.125			976.164			264.98
37	ABCD4	Homo sapiens ATP-binding cassette, sub-family D (ALD), member 4	NM_005050		1548.98	1719.37	164.619	948.202	1254.13	240.261	476.189	765.938	235.745	867.855	1155.89	257.534	0.0221949	0.0273201	0.067263	0.597199		554.71	759.916	190.32	774.467	843.893	94.391	449.535	565.115	138.979	0.469697	0.0193772	0.153941
			BC012815		1930.29			1491.24			810.894			1320.07								957.547			934.532			715.739
			NM_020326		1758.1			1186.09			728.977			1016.09								646.511			751.224			444.429
			NM_020325		1640.14			1390.99			1047.69			1419.53								880.897			915.35			650.755
38	ABCE1	Homo sapiens ATP-binding cassette, sub-family E (OABP), member 1	NM_002940		2099.46	2099.46		1806.77	1806.77		1526.59	1526.59		1465.62	1465.62							603.533	603.533		1487.84	1487.84		411.58	411.58
39	ABCF1	Homo sapiens ATP-binding cassette, sub-family F (GCN20), member 1	NM_001025091		12002.9	12002.9		11174.3	11174.3		9224.15	9224.15		9800.91	9800.91							10376.3	10376.3		10858.2	10858.2		9287.66	9287.66
40	ABCF2	Homo sapiens ATP-binding cassette, sub-family F (GCN20), member 2	NM_005692		6993.51	7510.96	664.985	6535.58	6774.22	407.85	5469.9	6022.09	525.907	6009.38	6525.51	515.168	0.19164	0.126293	0.301853	0.549635		8394.33	8382.41	751.101	7770.54	7963.43	721.464	6668.75	6373.22	573.285	0.524361	0.0430153	0.0237848
			BC001661		8261			7245.15			6517.03			7039.71								9127.47			8761.73			6738.45
			AF091073		7278.37			6541.93			6079.34			6527.43								7625.41			7358.01			5712.47
			NM_007189		1136.04			976.232			624.999			796.798								682.464			844.065			379.246
41	ABCF3	Homo sapiens ATP-binding cassette, sub-family F (GCN20), member 3	NM_018358		6284.14	6284.14		5502.99	5502.99		4961.29	4961.29		5268.22	5268.22							7928.87	7928.87		6693.29	6693.29		6098.34	6098.34
42	ABCG1	Homo sapiens ATP-binding cassette, sub-family G (WHITE), member 1	X91249		43.7193	43.7193		46.5936	46.5936		53.646	53.646		46.5365	46.5365							24.0436	24.0436		27.8621	27.8621		32.9473	32.9473
43	ABCG2	Homo sapiens ATP-binding cassette, sub-family G (WHITE), member 2	BC021281		67.805	52.5188	13.4925	70.4604	55.3494	13.5801	88.8931	62.3621	23.4145	83.828	60.0291	20.9189	0.810505	0.682205	0.903883	0.764009		37.5815	39.1199	11.7073	33.0915	35.4012	10.6613	44.5045	38.9878	11.5303	0.705174	0.712725	0.989557
			NM_004827		47.483			51.4219			53.6044			51.7089								28.2579			26.0841			25.7355
			AK002040		42.2685			44.1659			44.5888			44.5505								51.5203			47.0281			46.7233
44	ABCG4	Homo sapiens ATP-binding cassette, sub-family G (WHITE), member 4	NM_022169		292.887	292.887		447.44	447.44		501.846	501.846		484.093	484.093							183.982	183.982		126.857	126.857		306.283	306.283
45	CFTR	Homo sapiens cystic fibrosis transmembrane conductance regulator	NM_000492		62.6334	62.6334		77.3254	77.3254		101.935	101.935		90.7654	90.7654							40.127	40.127		26.9537	26.9537		42.8787	42.8787
46	TAP1	Homo sapiens transporter 1, ATP-binding cassette, sub-family B (MDR/TAP)	NM_000593		5332.88	5332.88		4185.55	4185.55		3462.02	3462.02		4295.77	4295.77							3934.32	3934.32		2405.13	2405.13		1470.31	1470.31
47	TAP2	Homo sapiens cystic fibrosis transmembrane conductance regulator (ATP-binding cassette sub-family C, member 7)	NM_000544		1448.76	3365.61	136.243	1441.44	2614.83	94.5376	688.962	2485.22	190.873	1162.97	2027.84	74.6054	0.00227087	0.371063	0.039431	0.00135451		340.639	4902.84	12.0755	843.527	4000.89	35.2587	425.159	3430.97	49.2747	0.000140914	0.000160713	0.000182794
			NM_018833		3505.49			2681.08			2612.83			2070.41								4906.91			4029.26			3428.83
			BC002751		3233.32			2506.57			2265.79			1941.69								4912.36			4011.98			3382.79
			AF105151		3358.03			2656.85			2577.04			2071.41								4889.26			3961.41			3481.27
