# Supplementary material for: Identification of Reference Genes in Human Myelomonocytic Cells for Gene Expression Studies in Altered Gravity
Source: Biomed Res Int. 2015 Jan 13;2015:363575. doi: 10.1155/2015/363575 (PMC4309215; doi:10.1155/2015/363575)
Supplement: Supplementary file 1 — Supplementary Table 1 summarizes the differential gene expression analysis of the potential reference genes presented in our study. Fluorescence, mean fluorescence and standard deviation values are given for the individual gene probes at different g-conditions measured during the 19th DLR Parabolic flight campaign as well as for the TEXUS-49 sounding rocket mission. Gene expression levels were compared between the different g-conditions for those genes that are represented by at least 3 probes and p-values were calculated. Significant p-values below 0,05 are displayed in red. Supplementary Table 2 shows the analysis of the ABC transporter genes. Fluorescence, mean fluorescence and standard deviation values are given for the individual gene probes at different g-conditions measured during the 19th DLR Parabolic flight campaign as well as for the TEXUS-49 sounding rocket mission. Gene expression levels were compared between the different gconditions for those genes that are represented by at least 3 probes and p-values were calculated. Significant p-values below 0,05 are displayed in red. Supplementary Table 3 displays the analyzed tRNA related genes. Fluorescence, mean fluorescence and standard deviation values are given for the individual gene probes at different g-conditions measured during the 19th DLR Parabolic flight campaign as well as for the TEXUS-49 sounding rocket mission. Gene expression levels were compared between the different g-conditions for those genes that are represented by at least 3 probes and p-values were calculated. Significant p-values below 0,05 are displayed in red. [file 363575.f1.zip › Supplementary Table 3.xlsx]

## Sheet: tRNA related genes
				19th DLR PFC																	TEXUS-49
				H/W			1g			1.8g			µg			p-values					H/W			BL			µg			p-values
Gene symbol	Name	Accession Number		FI	Mean FI	SD	FI	Mean FI	SD	FI	Mean FI	SD	FI	Mean FI	SD	H/W vs. 1g	1g vs. 1.8g	1.8g vs. µg	1g vs. µg		FI	Mean FI	SD	FI	Mean FI	SD	FI	Mean FI	SD	H/W vs. BL	BL vs. µg	H/W vs. µg
AARS	Homo sapiens alanyl-tRNA synthetase	NM_001605		9758.2	9758.2		7343.23	7343.23		6319.09	6319.09		6978.49	6978.49							6612.59	6612.59		6859.56	6859.56		5923.77	5923.77
CARS	Homo sapiens cysteinyl-tRNA synthetase	AK125503		1282.28	3448.37	4169.66	1488.56	2869.51	3104.69	1523.63	2738.06	3201.62	1736.66	2850.93	3106.87	0.857191	0.961734	0.967149	0.994505		999.671	2061.63	2624.28	603.734	2236.63	3210.8	1084.94	2028.63	2471.23	0.945372	0.933688	0.988111
		AK131221		807.568			694.875			321.323			454.851								134.754			170.461			168.298
		NM_001014437		8255.27			6425.09			6369.22			6361.27								5050.46			5935.69			4832.65
DARS	Homo sapiens aspartyl-tRNA synthetase	BC000629		9520.36	8628.25	1261.63	8425.23	7678	1056.74	7544.45	7297.94	348.618	8176.68	7691.88	685.61						5555.5	4761.2	1123.3	8029.53	6831.88	1693.74	5570.53	4951.99	874.751
		NM_001349		7736.15			6930.77			7051.43			7207.08								3966.91			5634.22			4333.45
DARS2	Homo sapiens aspartyl-tRNA synthetase 2, mitochondrial	BC045173		3442.64	3500.26	81.4826	2010.45	2060.2	70.367	1273.07	1376.39	146.115	1506.62	1650.89	204.031						2424.72	2525.4	142.392	4207.94	4271.45	89.8071	2282.18	2364.25	116.064
		NM_018122		3557.87			2109.96			1479.71			1795.16								2626.09			4334.95			2446.32
EARS2	Homo sapiens glutamyl-tRNA synthetase 2, mitochondrial (putative)	BC040013		343.329	1100.9	1071.37	282.845	788.862	715.615	289.982	545.023	360.682	264.27	617.582	499.658						171.273	539.127	520.225	125.69	704.788	818.967	136.159	389.75	358.632
		NM_133451		1858.47			1294.88			800.063			970.894								906.982			1283.88			643.341
EPRS	Homo sapiens glutamyl-prolyl-tRNA synthetase	NM_004446		6186.47	6186.47		4925.66	4925.66		4365.41	4365.41		4715.52	4715.52							1913.9	1913.9		2884.69	2884.69		1357.56	1357.56
FARS2	Homo sapiens phenylalanyl-tRNA synthetase 2, mitochondrial	NM_006567		1581.85	1581.85		544.874	544.874		195.704	195.704		333.072	333.072							1048.86	1048.86		1380.33	1380.33		628.91	628.91
GARS	Homo sapiens glycyl-tRNA synthetase	NM_002047		14162.6	14162.6		13248.1	13248.1		11985.5	11985.5		12772.9	12772.9							8698.8	8698.8		11604.5	11604.5		9305.71	9305.71
HARS	Homo sapiens histidyl-tRNA synthetase	NM_002109		7315.29	7315.29		7710.45	7710.45		4886.55	4886.55		6220.44	6220.44							5964.97	5964.97		6893.88	6893.88		6101.72	6101.72
DTD1	Homo sapiens D-tyrosyl-tRNA deacylase 1	BC045167		5501.46	3716.2	1546.98	8582.01	4992.04	3110.2	8286.23	4544.7	3242.47	8147.26	4647.66	3033.85	0.570842	0.871472	0.969898	0.897442		6102.56	4812.72	1121	7392.77	6136.36	1094.92	7620.13	5184.56	2109.8	0.217319	0.53777	0.804718
		BC100923		2876.1			3283.23			2793.58			3035.04								4261.96			5630.32			4014.21
		NM_080820		2771.02			3110.86			2554.28			2760.66								4073.63			5386.01			3919.35
IARS	Homo sapiens isoleucyl-tRNA synthetase	BC065552		7506.89	8281.26	1095.13	4773.39	5476.29	994.041	4032.06	4287.48	361.226	4669.33	5098.58	607.057						3673.4	3925.27	356.199	6075.97	6616.64	764.614	3848.02	4071.45	315.974
		NM_002161		9055.63			6179.18			4542.91			5527.84								4177.14			7157.3			4294.87
IARS2	Homo sapiens isoleucyl-tRNA synthetase 2, mitochondrial	NM_018060		7490.78	7490.78		7540.27	7540.27		6112.3	6112.3		6698.86	6698.86							3631.88	3631.88		7047.03	7047.03		3796.09	3796.09
KARS	Homo sapiens lysyl-tRNA synthetase	AF285758		10156.4	8240.37	2709.67	8808.62	6928.67	2658.65	8088.74	6321.34	2499.48	7828.39	6217.2	2278.57						7616.96	5899.95	2428.22	10316.7	8230.66	2950.16	8036.21	5976.97	2912.21
		NM_005548		6324.34			5048.71			4553.94			4606								4182.94			6144.59			3917.72
LARS	Homo sapiens leucyl-tRNA synthetase	AK025441		6711.87	4035.61	2496.83	4966.8	2926.76	1827.43	3601.29	1964.81	1460.13	4200.37	2405.36	1631.28	0.571286	0.51742	0.745208	0.731289		4396.99	2171.73	2009.03	6133.95	3234.71	2667.59	3207.87	1481.26	1529.81	0.61287	0.392259	0.662119
		BC110084		1768.85			1439.65			795.253			1013.35								491.324			884.066			294.797
		NM_020117		3626.09			2373.83			1497.87			2002.38								1626.89			2686.11			941.104
LARS2	Homo sapiens leucyl-tRNA synthetase 2, mitochondrial	NM_015340		2562.08	2562.08		2162.67	2162.67		1448.15	1448.15		1757.98	1757.98							1710.97	1710.97		1936.32	1936.32		1093.02	1093.02
MARS	Homo sapiens methionyl-tRNA synthetase	NM_004990		8981.25	8981.25		6039.03	6039.03		3233.32	3233.32		4844.73	4844.73							9399.06	9399.06		8382.12	8382.12		5632.27	5632.27
MARS2	Homo sapiens methionyl-tRNA synthetase 2, mitochondrial	NM_138395		2529.61	2529.61		1929.48	1929.48		1912.84	1912.84		1791.44	1791.44							3566.02	3566.02		5940.22	5940.22		4262.84	4262.84
NARS	Homo sapiens asparaginyl-tRNA synthetase	NM_004539		14322.5	14322.5		13167.6	13167.6		11381.5	11381.5		11590.9	11590.9							8976.89	8976.89		11372.8	11372.8		8408.31	8408.31
NARS2	Homo sapiens asparaginyl-tRNA synthetase 2, mitochondrial (putative)	NM_024678		2110.98	2110.98		1547.05	1547.05		748.729	748.729		1127.41	1127.41							1072.01	1072.01		2014.21	2014.21		798.385	798.385
PARS2	Homo sapiens prolyl-tRNA synthetase 2, mitochondrial (putative)	NM_152268		1163.54	1163.54		1183.46	1183.46		1273.34	1273.34		1291.11	1291.11							2167.78	2167.78		1518.15	1518.15		1473.77	1473.77
PTRH2	Homo sapiens peptidyl-tRNA hydrolase 2	BX647177		893.795	629.615	373.607	718.667	504.551	302.806	445.654	320.898	176.431	588.513	397.502	270.131						262.729	178.928	118.512	375.985	296.919	111.815	227.356	158.124	97.909
		NM_001015509		365.435			290.435			196.143			206.49								95.1268			217.854			88.8919
QARS	Homo sapiens glutaminyl-tRNA synthetase	NM_005051		19154.6	19154.6		19697.2	19697.2		16167.4	16167.4		17900.3	17900.3							24992.4	24992.4		23085.5	23085.5		20695.1	20695.1
RARS	Homo sapiens arginyl-tRNA synthetase	NM_002887		6263.27	6263.27		6600.68	6600.68		6726.78	6726.78		6245.49	6245.49							3838.96	3838.96		4860.2	4860.2		3694.59	3694.59
SARS	Homo sapiens seryl-tRNA synthetase	AK093718		7069.05	7160.41	500.976	4892.31	5405.75	410.558	4274.38	4470.42	174.051	4411.95	4713.27	254.444	0.00184634	0.0134343	0.172625	0.035037		5142.66	6110.2	694.551	5305.97	6079.06	734.169	4462.7	5300.02	836.428	0.952866	0.211843	0.188342
		BC000716		6506.65			5689.95			4546.37			4880.46								6350.7			6412.18			6115.27
		CR626109		7673.66			5780.19			4670.95			4962.67								6781.08			6936.06			5916.38
		NM_006513		7392.26			5260.56			4389.98			4598.03								6166.35			5662.02			4705.72
SARS2	Homo sapiens seryl-tRNA synthetase 2, mitochondrial	NM_017827		4249.27	4249.27		3408.69	3408.69		1957.37	1957.37		2921.92	2921.92							6739.38	6739.38		3934.87	3934.87		3765.17	3765.17
TARS	Homo sapiens threonyl-tRNA synthetase	BC010578		7836.53	8278.83	625.507	6253.29	6608.16	501.863	4759.52	4888.59	182.536	5396.09	5521.02	176.672						5432.5	5447.22	20.8247	6953.87	7201.61	350.363	4774.06	4916.11	200.899
		NM_152295		8721.13			6963.03			5017.66			5645.95								5461.95			7449.36			5058.17
VARS	Homo sapiens valyl-tRNA synthetase	NM_006295		15981.3	15981.3		12998.9	12998.9		9679.39	9679.39		11751	11751							24893.8	24893.8		25136.6	25136.6		26304.1	26304.1
WARS	Homo sapiens tryptophanyl-tRNA synthetase	BC095453		9100.31	6926.29	3074.53	8270.16	6108.39	3057.21	7178.17	5583.84	2254.71	7631.76	5737.49	2678.9						6869.55	5198.24	2363.58	7413.3	5612.08	2547.31	5851.94	4520.59	1882.81
		NM_004184		4752.27			3946.61			3989.52			3843.22								3526.94			3810.86			3189.25
WARS2	Homo sapiens tryptophanyl tRNA synthetase 2, mitochondrial	NM_015836		563.37	563.37		429.57	429.57		225.972	225.972		262.387	262.387							336.32	336.32		736.448	736.448		292.276	292.276
YARS	Homo sapiens tyrosyl-tRNA synthetase	NM_003680		17549	17549		14928.7	14928.7		12962.9	12962.9		14333.5	14333.5							16862.1	16862.1		15482	15482		13968.6	13968.6
YARS2	Homo sapiens tyrosyl-tRNA synthetase 2, mitochondrial	BC015625		2226.71	2214.05	17.9051	1486.19	1490.37	5.91682	922.113	1062.3	198.251	1181.09	1222.73	58.8878						1518.99	1601.74	117.027	1490.11	1509.62	27.5971	748.117	818.793	99.9508
		NM_015936		2201.39			1494.55			1202.48			1264.37								1684.49			1529.13			889.469
XPOT	Homo sapiens exportin, tRNA	NM_007235		5149.44	5149.44		3541.88	3541.88		2572.76	2572.76		3051.28	3051.28							1886.9	1886.9		3058.91	3058.91		1327.96	1327.96
